# Supplementary material
Source: PubMed Central journal article supplement (PMC3631682)
Supplement: 1304321110_pnas.201304321SI.pdf [file 1304321110_pnas.201304321SI.pdf]

# Supporting Information

Zhang et al. 10.1073/pnas.1304321110

## SI Materials and Methods

**Materials.** Human prostate cancer 3 (PC-3), mouse breast cancer Met-1, Lewis lung carcinoma (LLC), and mouse melanoma B16F10 cells were from ATCC. Human umbilical vein endothelial cells (HUVECs, Clonetics) from Lonza were cultured in endothelial basal medium-2 with supplements according to the manufacturer's instructions. Assays with HUVECs were conducted with cells from passages 2–6.

**Cell Proliferation Assay.** HUVECs or cancer cells were seeded in 24-well or 96-well plates in complete medium and allowed to attach overnight. The cells were then treated with test compounds for 24 h. Cell proliferation was measured using BrdU (Millipore) or MTT [3-(4,5-dimethylthiazol-2-yl)-2,5-diphenyltetrazolium bromide] assay (Sigma-Aldrich).

**Tube Formation Assay.** The 96-well plates were coated with 35  $\mu\text{L}$  per well of growth-factor reduced Matrigel (BD Biosciences), solidified at 37 °C for 30 min; then  $1.5\text{--}2 \times 10^4$  HUVECs in 100  $\mu\text{L}$  basal medium were added to each well (1). After a 6-h treatment, the cells were stained with Calcein AM and fluorescence microscope images were recorded and analyzed by Wimasis Image Analysis (2).

**Gelatin Zymography.** HUVECs were seeded in six-well plates in complete endothelial medium and allowed to attach overnight; then the cells were treated with test compounds for 4–6 h. Matrix metalloproteinase (MMP) activity in the cell culture medium was analyzed by zymography using Novex 10% Zymogram (gelatin) gel (Invitrogen).

**HUVEC Migration Assay.** Cell culture inserts for 24-well plate containing membrane with 8- $\mu\text{m}$  pores (BD Biosciences) were coated with 10  $\mu\text{g}/\text{mL}$  fibronectin (BD Biosciences) or vitronectin (R&D Systems) at 37 °C for 1 h. HUVECs ( $5 \times 10^4$  cells per well) were seeded onto the upper chamber of cell culture inserts in 400  $\mu\text{L}$  serum-free medium, the bottom chamber was filled with 500  $\mu\text{L}$  basal medium containing 10 ng/mL human vascular endothelial growth factor (VEGF) 165 (R&D Systems) as chemoattractants. The test compounds were added into both top and bottom chambers. After an 18-h incubation, the inserts were washed by PBS, fixed by 5% glutaraldehyde for 30 min, and the unmigrated cells were removed by cotton swabs. The migrated cells were stained with crystal violet, and microscope images were recorded. Cell counting was carried out using ImageJ software (3).

**RT-PCR Angiogenesis Array and RT-PCR.** HUVECs were seeded in six-well plates in complete endothelial medium and allowed to attach overnight; then the cells were treated with 3  $\mu\text{M}$  19,20-epoxydocosapentaenoic acid (19,20-EDP) in basal medium for 6 h. Total RNA was isolated and was subjected to a commercial human Angiogenesis RT<sup>2</sup> Profiler PCR Array (SABiosciences). The target genes from the array were further verified by RT-PCR, including TIMP3 (primer catalog Hs00165949\_m1; Applied Biosystems), ANGPTL4 (Hs01101127\_m1), VEGF-A (Hs00900055\_m1), and VEGF-C (Hs01099203\_m1).

**Immunoblotting.** HUVECs were seeded in six-well plates in complete endothelial medium and allowed to grow to ~90% confluence, followed by serum-starvation in basal endothelial medium for 24 h. The cells were treated with 1  $\mu\text{M}$  19,20-EDP or 14,15-epoxyicosatrienoic acid (EET), and then immediately stimulated

with 50 ng/mL human VEGF 165 (R&D Systems) for 10 min. The medium was decanted, washed with cold PBS buffer, and then the cells were lysed and the cell lysates were resolved using SDS/PAGE and transferred onto a nitrocellulose membrane. The membranes were blocked in 5% nonfat dry milk for 1 h at room temperature and probed with rabbit monoclonal phospho VEGFR2 (Tyr1175) antibody (Cell Signaling Technology) and mouse monoclonal anti- $\beta$ -actin antibody (Sigma-Aldrich). The membranes were then probed with horseradish peroxidase (HRP)-tagged secondary antibodies. The secondary antibodies on the blot were detected by an ECL Plus Western blotting detection reagent (GE Healthcare).

**Cancer Cell Invasion Assay.** Cell culture inserts for 24-well plate containing membrane with 8- $\mu\text{m}$  pores were coated with 20  $\mu\text{L}$  of 1:6 diluted Matrigel (BD Biosciences) and the Matrigel was allowed to solidify at 37 °C for 30 min. PC-3 cells ( $5 \times 10^4$  cells per well) were seeded onto the upper chamber of cell culture inserts in 100  $\mu\text{L}$  serum-free medium; the bottom chamber was filled with 300  $\mu\text{L}$  complete medium containing 10% FBS as chemoattractants. The test compounds were added into both top and bottom chambers. After a 24-h incubation, the inserts were washed by PBS, fixed by 5% glutaraldehyde for 30 min, and the uninvaded cells were removed by cotton swabs. The whole membrane of the insert was cut out using a surgical blade and stained with ProLong Gold antifade reagent with DAPI (Invitrogen) overnight. The fluorescence image of the whole membrane was scanned by a Nikon Eclipse TE2000-E microscope and cell counting was carried out using Velocity software (PerkinElmer) (4).

**Lipidomics.** For plasma lipid mediator extraction, a Waters Oasis solid phase extraction (SPE) cartridge were prewashed, 250  $\mu\text{L}$  plasma with surrogate solution was loaded onto the SPE column, and washed with 95:5 (vol/vol) water/methanol with 0.1% acetic acid. The analytes were eluted with methanol and ethyl acetate, dried, and then reconstituted in methanol for LC-MS/MS analysis. For tumor lipid mediator extraction, ~100 mg of tumor tissues were mixed with the antioxidant solution (0.2 mg/mL butylated hydroxytoluene and 0.2 mg/mL triphenylphosphine in methanol), the surrogate solution, and 400  $\mu\text{L}$  extract solution (0.1% acetic acid with 0.2 mg/mL butylated hydroxytoluene in a methanol solution), and then homogenized; the resulting homogenates were kept in –80 °C overnight. After centrifugation of the homogenates, the pellets were washed with methanol (0.1% butylated hydroxytoluene and 0.1% acetic acid) and then combined with the supernatant. The combined solutions were extracted using SPE columns similar to the description above for the plasma lipid mediator extraction. The LC-MS/MS analysis was carried out on an Agilent 1200SL liquid chromatographic system (Agilent) coupled to a 4000 QTRAP MS/MS (AB SCIEX) as we previously described (5).

**Imaging.** Contrast-enhanced ultrasound images were acquired using an Acuson Sequoia 512 system (Siemens Medical Solutions), with a 15L8 linear array transducer at 7 MHz with a mechanical index of 0.28. After injection of the Definity contrast agent through a 24-gauge tail vein catheter in the tail vein, the time required for each pixel of the tumor to reach 80% of the final amplitude was assessed and values were used to create a parametric map.

1. Arnaoutova I, Kleinman HK (2010) In vitro angiogenesis: Endothelial cell tube formation on gelled basement membrane extract. *Nat Protoc* 5(4):628–635.
2. Khoo CP, Micklem K, Watt SM (2011) A comparison of methods for quantifying angiogenesis in the Matrigel assay in vitro. *Tissue Eng Part C Methods* 17(9):895–906.
3. Panigrahy D, et al. (2012) Epoxyeicosanoids stimulate multiorgan metastasis and tumor dormancy escape in mice. *J Clin Invest* 122(1):178–191.
4. Lochter A, et al. (1997) Misregulation of stromelysin-1 expression in mouse mammary tumor cells accompanies acquisition of stromelysin-1-dependent invasive properties. *J Biol Chem* 272(8):5007–5015.
5. Yang J, Schmelzer K, Georgi K, Hammock BD (2009) Quantitative profiling method for oxylipin metabolome by liquid chromatography electrospray ionization tandem mass spectrometry. *Anal Chem* 81(19):8085–8093.

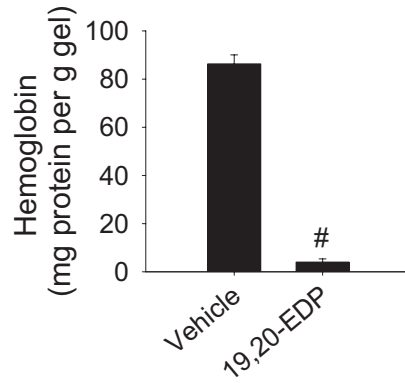

**Fig. S1.** Effect of 19,20-EDP on FGF-2–induced angiogenesis in a Matrigel plug assay in C57BL/6 mice ( $n = 4$  mice per group). Assay condition: Matrigels containing 500 ng FGF-2, 20 units heparin, with or without 10  $\mu$ g 19,20-EDP, were s.c. injected into mice. After 4 d of treatment, the gel plugs were dissected and hemoglobin in the gels were measured. All values represent means  $\pm$  SD. # $P < 0.001$ .

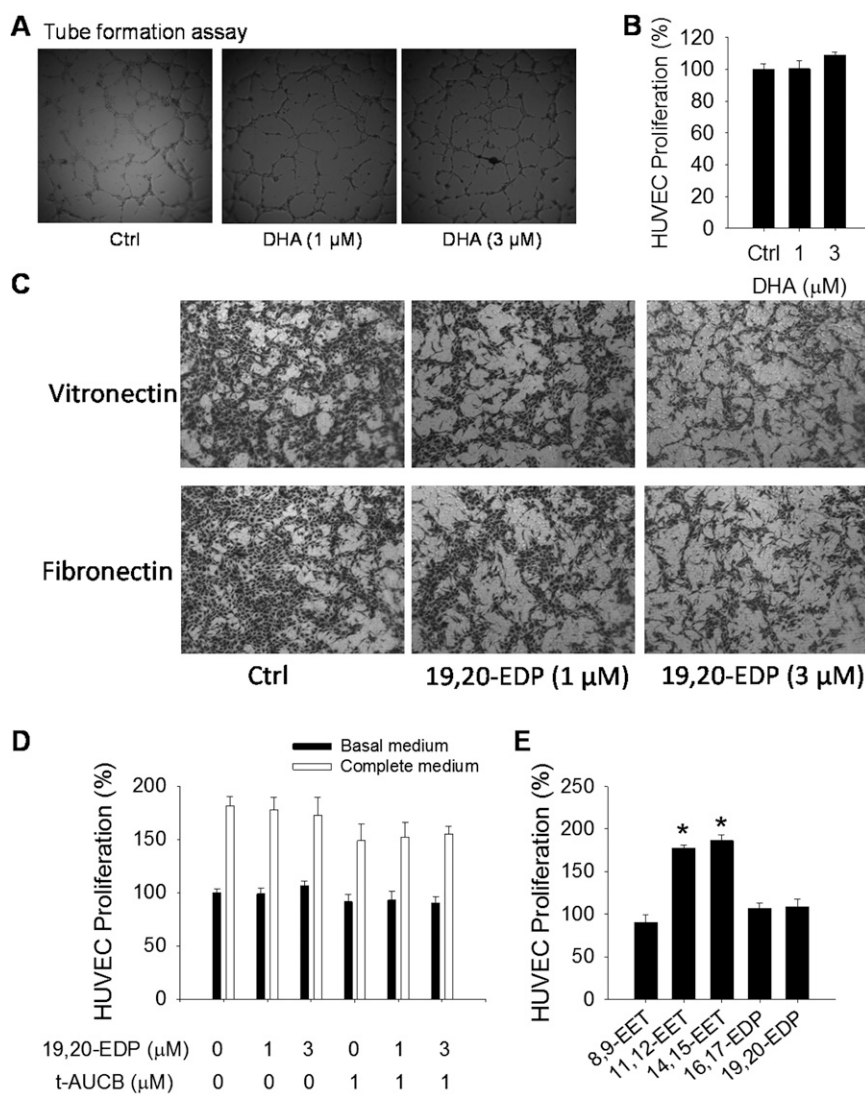

**Fig. S2.** (A) DHA (1–3 μM) has no effect on tube formation after 6-h treatment in HUVECs. Here shows representative HUVEC microscopy. In comparison, 19,20-EDP causes ~63% inhibition at 1 μM and ~91% inhibition at 3 μM as shown in Fig. 1C. (B) DHA has no effect on HUVEC proliferation after 24-h treatment. The 19,20-EDP (1–3 μM) also has no effect on HUVEC proliferation as shown in Fig. S2D. (C) The 19,20-EDP shows similar potency to inhibit VEGF-induced HUVEC migration on extracellular matrix proteins vitronectin and fibronectin. (D) Lack of effect of 19,20-EDP and t-AUCB on HUVEC proliferation after 24-h treatment in basal and complete medium. (E) Effects of 1 μM EET or EDP on HUVEC proliferation after 24-h treatment in basal medium. All values represent means  $\pm$  SD. \* $P < 0.05$ .

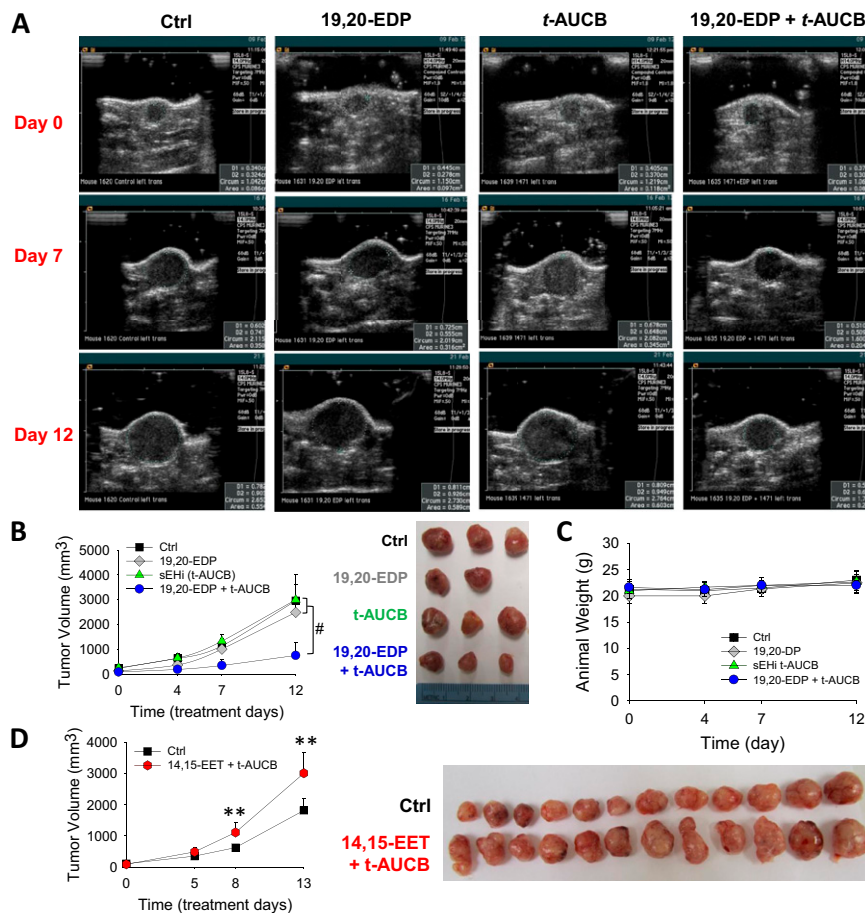

**Fig. S3.** (A) Images of representative ultrasound imaging of Met-1 tumors. Mice were continuously infused with (i) vehicle control, (ii) 0.05 mg·kg<sup>-1</sup>·d<sup>-1</sup> 19,20-EDP, (iii) 1 mg·kg<sup>-1</sup>·d<sup>-1</sup> t-AUCB, and (iv) 19,20-EDP + t-AUCB for 12 d. Only the combination of 19,20-EDP and t-AUCB significantly suppressed Met-1 tumor growth. (B) Representative images of Met-1 tumors of mice treated with 19,20-EDP (0.05 mg·kg<sup>-1</sup>·d<sup>-1</sup>) and/or t-AUCB (1 mg·kg<sup>-1</sup>·d<sup>-1</sup>). Left is from Fig. 2A. (C) Effect of 19,20-EDP and t-AUCB on animal weight in Met-1 experiment. (D) Representative images of Met-1 tumors of mice treated with 14,15-EET (0.05 mg·kg<sup>-1</sup>·d<sup>-1</sup>) and t-AUCB (1 mg·kg<sup>-1</sup>·d<sup>-1</sup>). Left is from Fig. 2D.

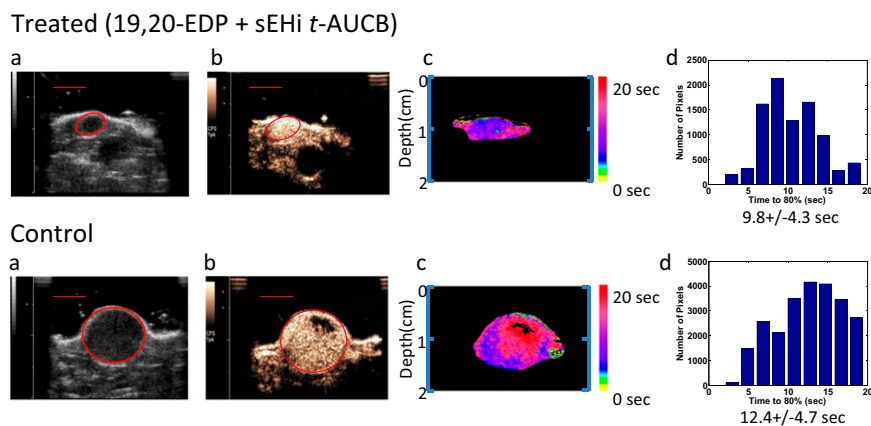

**Fig. S4.** Ultrasound imaging obtained after 12 d of coadministration of 19,20-EDP and sEHi t-AUCB (Upper), and sham-treated control (Lower). (A) Tumor (red circle) imaged in b-mode. (B) Contrast pulse sequence demonstrating microbubble concentration within the tumor. (C) Time to perfusion map. Color scale is in seconds, ranging up to 20 s. (D) Quantification of time required for contrast agent arrival. Color scale is normalized image intensity. Data show that tumor perfusion is maintained after treatment, whereas the larger, untreated tumors eventually become necrotic.

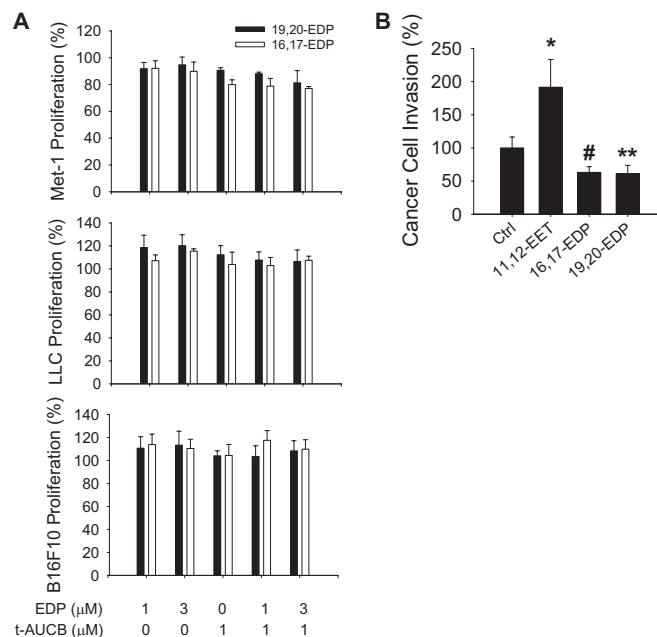

**Fig. S5.** (A) Lack of effects of EDPs and *t*-AUCB on cancer cell proliferation after 24-h treatment in basal medium. Three cancer cell lines were tested, including Met-1 mouse breast cancer, LLC mouse Lewis lung cancer, and B16F10 mouse melanoma. (B) Effects of EETs and EDPs on FBS-induced PC-3 cancer cell invasion. At 1 μM, 11,12-EET almost doubled PC-3 invasion, whereas 16,17- and 19,20-EDP inhibited ~40% of invasion. EETs and EDPs had no effect on PC-3 cancer cell proliferation (data not shown). All values represent means ± SD. \**P* < 0.05, \*\**P* < 0.01, #*P* < 0.001.

**Table S1. Angiogenesis RT-PCR array of 19,20-EDP in HUVEC cells**

| Gene    | Description                                                                                                    | Fold change | P value  |
|---------|----------------------------------------------------------------------------------------------------------------|-------------|----------|
| AKT1    | V-akt murine thymoma viral oncogene homolog 1                                                                  | 1.0639      | 0.434999 |
| ANG     | Angiogenin, ribonuclease, RNase A family, 5                                                                    | 1.0517      | 0.389077 |
| ANGPT1  | Angiopoietin 1                                                                                                 | 0.7593      | 0.012155 |
| ANGPT2  | Angiopoietin 2                                                                                                 | 1.0837      | 0.183883 |
| ANGPTL4 | Angiopoietin-like 4                                                                                            | 3.5129      | 0.000086 |
| ANPEP   | Alanyl (membrane) aminopeptidase                                                                               | 0.9812      | 0.775906 |
| BAI1    | Brain-specific angiogenesis inhibitor 1                                                                        | 0.5381      | 0.227189 |
| CCL11   | Chemokine (C-C motif) ligand 11                                                                                | 0.9858      | 0.819806 |
| CCL2    | Chemokine (C-C motif) ligand 2                                                                                 | 0.8289      | 0.364874 |
| CDH5    | Cadherin 5, type 2 (vascular endothelium)                                                                      | 0.9283      | 0.389882 |
| COL18A1 | Collagen, type XVIII, alpha 1                                                                                  | 0.9566      | 0.335365 |
| COL4A3  | Collagen, type IV, alpha 3 (Goodpasture antigen)                                                               | 1.0468      | 0.892614 |
| CTGF    | Connective tissue growth factor                                                                                | 0.8425      | 0.032492 |
| CXCL1   | Chemokine (C-X-C motif) ligand 1 (melanoma growth stimulating activity, alpha)                                 | 0.72        | 0.18266  |
| CXCL10  | Chemokine (C-X-C motif) ligand 10                                                                              | 0.4895      | 0.157361 |
| CXCL5   | Chemokine (C-X-C motif) ligand 5                                                                               | 0.7915      | 0.132829 |
| CXCL6   | Chemokine (C-X-C motif) ligand 6 (granulocyte chemotactic protein 2)                                           | 0.8582      | 0.260726 |
| CXCL9   | Chemokine (C-X-C motif) ligand 9                                                                               | 2.0411      | 0.377672 |
| EDN1    | Endothelin 1                                                                                                   | 0.8444      | 0.026741 |
| EFNA1   | Ephrin-A1                                                                                                      | 0.9633      | 0.635974 |
| EFNB2   | Ephrin-B2                                                                                                      | 1.2947      | 0.048037 |
| EGF     | Epidermal growth factor                                                                                        | 1.242       | 0.429438 |
| ENG     | Endoglin                                                                                                       | 1.0276      | 0.803019 |
| EPHB4   | EPH receptor B4                                                                                                | 1.0762      | 0.539671 |
| ERBB2   | V-erb-b2 erythroblastic leukemia viral oncogene homolog 2, neuro/glioblastoma derived oncogene homolog (avian) | 0.95        | 0.494111 |
| F3      | Coagulation factor III (thromboplastin, tissue factor)                                                         | 1.3654      | 0.284544 |
| FGF1    | Fibroblast growth factor 1 (acidic)                                                                            | 1.0614      | 0.702239 |
| FGF2    | Fibroblast growth factor 2 (basic)                                                                             | 0.9903      | 0.863181 |
| FGFR3   | Fibroblast growth factor receptor 3                                                                            | 0.7842      | 0.436079 |
| FIGF    | C-fos induced growth factor (vascular endothelial growth factor D)                                             | 1.0963      | 0.418671 |
| FLT1    | Fms-related tyrosine kinase 1 (vascular endothelial growth factor/vascular permeability factor receptor)       | 1.0182      | 0.833684 |
| FN1     | Fibronectin 1                                                                                                  | 1.0963      | 0.253789 |
| HGF     | Hepatocyte growth factor (hepapoietin A; scatter factor)                                                       | 0.827       | 0.254285 |
| HIF1A   | Hypoxia inducible factor 1, alpha subunit (basic helix-loop-helix transcription factor)                        | 1.042       | 0.8182   |
| HPSE    | Heparanase                                                                                                     | 0.9677      | 0.135877 |
| ID1     | Inhibitor of DNA binding 1, dominant negative helix-loop-helix protein                                         | 0.95        | 0.636255 |
| IFNA1   | IFN, alpha 1                                                                                                   | 2.1033      | 0.139338 |
| IFNG    | IFN, gamma                                                                                                     | 0.9858      | 0.819806 |
| IGF1    | Insulin-like growth factor 1 (somatomedin C)                                                                   | 1.9899      | 0.340659 |
| IL1B    | Interleukin 1, beta                                                                                            | 1.3007      | 0.605766 |
| IL6     | Interleukin 6 (IFN, beta 2)                                                                                    | 0.7879      | 0.002859 |
| IL8     | Interleukin 8                                                                                                  | 1.042       | 0.454881 |
| ITGAV   | Integrin, alpha V (vitronectin receptor, alpha polypeptide, antigen CD51)                                      | 1.2249      | 0.044954 |
| ITGB3   | Integrin, beta 3 (platelet glycoprotein IIIa, antigen CD61)                                                    | 0.8661      | 0.359791 |
| JAG1    | Jagged 1                                                                                                       | 1.1014      | 0.680348 |
| KDR     | Kinase insert domain receptor (a type III receptor tyrosine kinase)                                            | 1.1219      | 0.514564 |
| LECT1   | Leukocyte cell derived chemotaxin 1                                                                            | 1.8956      | 0.051173 |
| LEP     | Leptin                                                                                                         | 0.9113      | 0.97042  |
| MDK     | Midkine (neurite growth-promoting factor 2)                                                                    | 1.0444      | 0.526297 |
| MMP14   | Matrix metalloproteinase 14 (membrane inserted)                                                                | 0.8582      | 0.134235 |
| MMP2    | Matrix metalloproteinase 2 (gelatinase A, 72 kDa gelatinase, 72 kDa type IV collagenase)                       | 1.0276      | 0.60313  |
| MMP9    | Matrix metalloproteinase 9 (gelatinase B, 92 kDa gelatinase, 92 kDa type IV collagenase)                       | 1.8566      | 0.070132 |
| NOS3    | Nitric oxide synthase 3 (endothelial cell)                                                                     | 0.9972      | 0.987876 |
| NOTCH4  | Notch 4                                                                                                        | 0.9881      | 0.962319 |
| NRP1    | Neuropilin 1                                                                                                   | 0.9903      | 0.849161 |
| NRP2 2  | Neuropilin                                                                                                     | 1.1219      | 0.062026 |
| PDGFA   | Platelet-derived growth factor alpha polypeptide                                                               | 1.0253      | 0.691344 |

Table S1. Cont.

| Gene         | Description                                                                                            | Fold change   | P value         |
|--------------|--------------------------------------------------------------------------------------------------------|---------------|-----------------|
| PECAM1       | Platelet/endothelial cell adhesion molecule                                                            | 0.8988        | 0.132547        |
| PF4          | Platelet factor 4                                                                                      | 0.8156        | 0.104725        |
| PGF          | Placental growth factor                                                                                | 1.0812        | 0.675377        |
| PLAU         | Plasminogen activator, urokinase                                                                       | 1.0158        | 0.846356        |
| PLG          | Plasminogen                                                                                            | 1.1723        | 0.198452        |
| PROK2        | Prokineticin 2                                                                                         | 0.9858        | 0.819806        |
| PTGS1        | Prostaglandin-endoperoxide synthase 1 (prostaglandin G/H synthase and cyclooxygenase)                  | 0.9903        | 0.89772         |
| S1PR1        | Sphingosine-1-phosphate receptor 1                                                                     | 0.9478        | 0.298686        |
| SERPINE1     | Serpin peptidase inhibitor, clade E (nexin, plasminogen activator inhibitor type 1), member 1          | 1.0639        | 0.298782        |
| SERPINF1     | Serpin peptidase inhibitor, clade F (alpha-2 antiplasmin, pigment epithelium derived factor), member 1 | 0.697         | 0.096001        |
| SPHK1        | Sphingosine kinase 1                                                                                   | 0.9522        | 0.710641        |
| TEK          | TEK tyrosine kinase, endothelial                                                                       | 1.0324        | 0.783316        |
| TGFA         | Transforming growth factor, alpha                                                                      | 0.9903        | 0.890406        |
| TGFB1        | Transforming growth factor, beta 1                                                                     | 0.9456        | 0.571621        |
| TGFB2        | Transforming growth factor, beta 2                                                                     | 0.8063        | 0.181045        |
| TGFBR1       | Transforming growth factor, beta receptor 1                                                            | 1.0253        | 0.77697         |
| THBS1        | Thrombospondin 1                                                                                       | 1.1376        | 0.070326        |
| THBS2        | Thrombospondin 2                                                                                       | 0.3903        | 0.162237        |
| TIE1         | Tyrosine kinase with Ig-like and EGF-like domains 1                                                    | 0.9722        | 0.377212        |
| TIMP1        | TIMP metalloproteinase inhibitor 1                                                                     | 1.0862        | 0.382847        |
| TIMP2        | TIMP metalloproteinase inhibitor 2                                                                     | 1.0042        | 0.902882        |
| TIMP3        | TIMP metalloproteinase inhibitor 3                                                                     | 1.5576        | 0.005168        |
| TNF          | Tumor necrosis factor                                                                                  | 0.9858        | 0.819806        |
| TYMP         | Thymidine phosphorylase                                                                                | 0.661         | 0.486351        |
| VEGFA        | Vascular endothelial growth factor A                                                                   | 1.831         | 0.196409        |
| VEGFB        | Vascular endothelial growth factor B                                                                   | 1.0913        | 0.132982        |
| <b>VEGFC</b> | <b>Vascular endothelial growth factor C</b>                                                            | <b>0.2851</b> | <b>0.222407</b> |

Bold font indicates the most down-regulated gene.

**Table S2. Profile of lipid mediators in the plasma of treated mice in Met-1 tumor experiment**

| Lipid mediator  | Ctrl, nM        | 19,20- EDP, nM  | t-AUCB, nM      | 19,20-EDP + t-AUCB, nM |
|-----------------|-----------------|-----------------|-----------------|------------------------|
| 6-keto PGF1a    | 5.65 ± 2.29     | 10.58 ± 7.34    | 12.45 ± 10.15   | 1.68 ± 0.59            |
| TXB2            | 6.67 ± 3.39     | 6.61 ± 6.07     | 101.54 ± 136.24 | 2.66 ± 1.11            |
| 9,12,13-TriHOME | 11.76 ± 4.34    | 7.67 ± 0.69     | 13.14 ± 6.79    | 8.56 ± 1.73            |
| 9,10,13-TriHOME | 2.46 ± 0.79     | 1.50 ± 0.15     | 2.74 ± 1.33     | 1.82 ± 0.32            |
| PGE2            | 0.74 ± 0.26     | 0.47 ± 0.19     | 1.36 ± 1.05     | 0.38 ± 0.18            |
| PGD2            | 0.73 ± 0.30     | 0.50 ± 0.06     | 1.45 ± 1.22     | 0.53 ± 0.33            |
| 15,16-DiHODE    | 3.43 ± 0.60     | 3.62 ± 0.57     | 5.11 ± 2.21     | 3.18 ± 0.74            |
| 9,10-DiHODE     | 2.04 ± 0.65     | 1.74 ± 0.03     | 2.60 ± 1.02     | 1.80 ± 0.83            |
| 12,13-DiHODE    | 4.22 ± 1.05     | 4.90 ± 0.60     | 5.07 ± 1.75     | 4.44 ± 1.38            |
| 14,15-DiHETE    | 0.07 ± 0.05     | 0.10 ± 0.04     | 0.16 ± 0.05     | 0.10 ± 0.03            |
| 11,12-DiHETE    | 0.05 ± 0.02     | 0.04 ± 0.02     | 0.12 ± 0.03     | 0.05 ± 0.01            |
| 12,13-DiHOME    | 81.13 ± 20.10   | 89.83 ± 5.69    | 114.63 ± 39.19  | 85.60 ± 23.32          |
| 8,9-DiHETE      | 0.09 ± 0.06     | 0.20 ± 0.11     | 0.17 ± 0.10     | 0.18 ± 0.08            |
| 9,10-DiHOME     | 16.49 ± 4.25    | 13.28 ± 1.22    | 24.13 ± 7.63    | 14.60 ± 4.34           |
| 19,20-DiHDPA    | 4.16 ± 0.57     | 4.12 ± 1.53     | 4.20 ± 0.47     | 4.04 ± 0.69            |
| 14,15-DiHETrE   | 0.98 ± 0.23     | 1.13 ± 0.48     | 1.40 ± 0.17     | 0.80 ± 0.07            |
| 16,17-DiHDPA    | 0.44 ± 0.09     | 0.51 ± 0.16     | 0.71 ± 0.11     | 0.42 ± 0.03            |
| 11,12-DiHETrE   | 0.58 ± 0.15     | 0.58 ± 0.24     | 0.76 ± 0.05     | 0.44 ± 0.01            |
| 13,14-DiHDPA    | 0.20 ± 0.05     | 0.23 ± 0.08     | 0.28 ± 0.07     | 0.18 ± 0.02            |
| 10,11-DiHDPA    | 0.14 ± 0.08     | 0.20 ± 0.04     | 0.21 ± 0.04     | 0.19 ± 0.03            |
| 8,9-DiHETrE     | 0.47 ± 0.09     | 0.41 ± 0.13     | 0.49 ± 0.02     | 0.39 ± 0.07            |
| EKODE           | 2.77 ± 1.57     | 1.91 ± 0.81     | 2.86 ± 1.53     | 1.45 ± 0.40            |
| 5,6-DiHETrE     | 2.05 ± 1.35     | 1.58 ± 0.30     | 1.79 ± 0.41     | 2.14 ± 0.36            |
| 13-HODE         | 106.88 ± 31.22  | 91.90 ± 19.61   | 177.95 ± 72.01  | 96.74 ± 33.58          |
| 9-HODE          | 35.38 ± 10.31   | 28.50 ± 5.54    | 49.10 ± 16.59   | 29.34 ± 9.13           |
| 15(16)-EpODE    | 81.00 ± 41.81   | 89.17 ± 21.65   | 114.38 ± 22.37  | 140.60 ± 77.21         |
| 15-HETE         | 4.42 ± 2.17     | 5.16 ± 2.73     | 33.86 ± 32.94   | 2.38 ± 0.39            |
| 9(10)-EpODE     | 13.28 ± 16.78   | 16.79 ± 3.82    | 19.41 ± 9.84    | 30.27 ± 20.94          |
| 17(18)-EpETE    | 1.89 ± 1.38     | 1.40 ± 0.28     | 1.93 ± 0.70     | 2.58 ± 0.80            |
| 11-HETE         | 3.40 ± 1.72     | 4.17 ± 2.39     | 28.49 ± 32.49   | 1.75 ± 0.43            |
| 12(13)-EpODE    | 11.45 ± 9.58    | 12.85 ± 2.65    | 16.26 ± 5.34    | 26.16 ± 19.28          |
| 13-oxo ODE      | 4.44 ± 1.87     | 5.40 ± 1.76     | 7.37 ± 2.78     | 10.30 ± 6.99           |
| 15-oxo ETE      | 0.84 ± 0.30     | 0.64 ± 0.31     | 1.14 ± 0.52     | 0.49 ± 0.07            |
| 9-oxo ODE       | 6.73 ± 2.73     | 4.77 ± 1.76     | 8.16 ± 1.96     | 4.71 ± 0.98            |
| 14(15)-EpETE    | 0.67 ± 0.91     | 0.73 ± 0.12     | 0.95 ± 0.50     | 1.44 ± 0.57            |
| 8-HETE          | 3.36 ± 1.07     | 3.56 ± 1.46     | 9.71 ± 10.08    | 3.05 ± 0.90            |
| 12-HETE         | 239.63 ± 133.33 | 332.83 ± 214.62 | 325.75 ± 184.20 | 223.20 ± 91.01         |
| 11(12)-EpETE    | 1.01 ± 0.94     | 0.81 ± 0.13     | 0.93 ± 0.32     | 1.55 ± 0.65            |
| 9-HETE          | 1.16 ± 0.68     | 0.62 ± 0.32     | 1.12 ± 0.41     | 0.52 ± 0.09            |
| 15 (s)-HETrE    | 0.83 ± 0.28     | 1.29 ± 0.63     | 2.75 ± 2.08     | 0.71 ± 0.10            |
| 5-HETE          | 3.48 ± 0.95     | 3.09 ± 0.82     | 4.11 ± 0.77     | 2.74 ± 0.49            |
| 19,20-EDP       | 10.12 ± 4.38    | 10.53 ± 2.4     | 9.3 ± 2.63      | 24.67 ± 8.52           |
| 12(13)-EpOME    | 121.08 ± 137.48 | 135.00 ± 27.73  | 177.65 ± 76.28  | 255.88 ± 200.06        |
| 14(15)-EpETrE   | 17.22 ± 23.12   | 11.72 ± 2.97    | 16.60 ± 9.84    | 21.76 ± 15.40          |
| 9(10)-EpOME     | 92.43 ± 122.81  | 98.23 ± 11.14   | 117.60 ± 70.59  | 187.26 ± 163.24        |
| 16,17-EDP       | 2.42 ± 2.46     | 2.71 ± 0.78     | 2.9 ± 1.55      | 6.32 ± 3.54            |
| 13,14-EDP       | 1.99 ± 1.67     | 2.54 ± 1.05     | 2.5 ± 1.38      | 4.97 ± 2.01            |
| 10,11-EDP       | 2.85 ± 1.95     | 3.63 ± 1.48     | 3.8 ± 2.07      | 8.14 ± 2.52            |
| 11(12)-EpETrE   | 12.48 ± 10.27   | 12.11 ± 2.77    | 18.24 ± 8.38    | 21.84 ± 7.22           |
| 8(9)-EpETrE     | 7.26 ± 7.41     | 5.83 ± 0.42     | 8.26 ± 3.46     | 11.41 ± 4.80           |
| 5(6)-EpETrE     | 7.93 ± 8.24     | 8.60 ± 1.23     | 12.95 ± 7.81    | 16.64 ± 9.50           |
| 9-HOTrE         | 1.26 ± 0.38     | 1.05 ± 0.22     | 1.53 ± 0.48     | 1.01 ± 0.31            |
| 13-HOTrE        | 2.38 ± 0.75     | 2.05 ± 0.37     | 3.22 ± 1.24     | 2.03 ± 0.70            |
| 15-HEPE         | 0.34 ± 0.23     | 0.17 ± 0.21     | 0.19 ± 0.06     | 0.05 ± 0.06            |
| 8-HEPE          | 0.34 ± 0.29     | 0.14 ± 0.09     | 0.11 ± 0.03     | 0.11 ± 0.07            |
| 12-HEPE         | 11.89 ± 6.77    | 18.96 ± 10.18   | 36.56 ± 26.46   | 15.17 ± 10.39          |
| 5-HEPE          | 0.34 ± 0.09     | 0.32 ± 0.10     | 0.39 ± 0.05     | 0.25 ± 0.06            |



**Table S3. Profile of lipid mediators in the tumor tissues of treated mice in Met-1 tumor experiment**

| Lipid mediator      | Ctrl, pmol/g        | 19,20 EDP, pmol/g   | t-AUCB, pmol/g      | 19,20 EDP + t-AUCB, pmol/g |
|---------------------|---------------------|---------------------|---------------------|----------------------------|
| 6 keto PGF1a        | 733.35 ± 148.22     | 1,318.13 ± 786.45   | 724.98 ± 142.53     | 1,065.15 ± 255.22          |
| TXB2                | 1,170.39 ± 1,319.91 | 889.23 ± 761.51     | 958.25 ± 573.85     | 1,947.67 ± 1,498.07        |
| 9,12,13-TriHOME     | 89.22 ± 66.15       | 124.26 ± 91.08      | 103.38 ± 29.38      | 193.29 ± 134.37            |
| 9,10,13-TriHOME     | 25.57 ± 14.66       | 36.40 ± 26.40       | 37.46 ± 13.55       | 56.44 ± 39.32              |
| PGF2a               | 323.08 ± 105.53     | 330.51 ± 116.61     | 388.04 ± 144.26     | 487.56 ± 111.72            |
| PGE2                | 553.45 ± 241.17     | 632.11 ± 358.57     | 619.70 ± 271.78     | 935.47 ± 349.41            |
| PGD2                | 1,104.70 ± 843.12   | 941.28 ± 556.63     | 818.76 ± 344.51     | 1,672.63 ± 759.82          |
| 11,12,15-TriHETrE   | 356.16 ± 304.37     | 468.72 ± 502.61     | 292.31 ± 107.03     | 591.53 ± 509.12            |
| PGJ2                | 42.16 ± 17.35       | 39.42 ± 14.19       | 35.78 ± 12.44       | 51.67 ± 15.98              |
| 15,16-DiHODE        | 3.10 ± 1.60         | 3.23 ± 1.45         | 4.40 ± 1.44         | 6.41 ± 2.84                |
| 9,10-DiHODE         | 0.88 ± 0.98         | 1.68 ± 2.06         | 1.00 ± 0.26         | 2.84 ± 2.79                |
| 12,13-DiHODE        | 1.83 ± 0.40         | 1.76 ± 0.63         | 2.96 ± 0.61         | 4.02 ± 1.46                |
| 6 <i>trans</i> LTB4 | 23.53 ± 27.15       | 23.80 ± 19.89       | 18.05 ± 5.54        | 35.47 ± 29.04              |
| 5,15-DiHETE         | 4.21 ± 4.13         | 4.73 ± 3.88         | 3.12 ± 0.62         | 7.26 ± 2.95                |
| 17,18-DiHETE        | 3.58 ± 2.67         | 4.31 ± 3.42         | 3.95 ± 1.16         | 5.57 ± 2.38                |
| LTB4                | 17.26 ± 5.54        | 14.16 ± 2.03        | 9.77 ± 1.66         | 20.10 ± 5.59               |
| 14,15-DiHETE        | 0.25 ± 0.27         | 0.54 ± 0.50         | 0.21 ± 0.07         | 0.63 ± 0.59                |
| 11,12-DiHETE        | 0.33 ± 0.38         | 0.44 ± 0.44         | 0.21 ± 0.09         | 0.54 ± 0.44                |
| 12,13-DiHOME        | 48.69 ± 27.77       | 53.19 ± 30.89       | 82.17 ± 24.43       | 100.13 ± 46.82             |
| 8,9-DiHETE          | 0.41 ± 0.36         | 0.59 ± 0.75         | 0.60 ± 0.25         | 1.96 ± 1.89                |
| 9,10-DiHOME         | 23.63 ± 27.61       | 38.42 ± 44.50       | 21.79 ± 4.28        | 53.32 ± 53.27              |
| 19,20-DiHDPA        | 36.51 ± 21.48       | 43.23 ± 35.10       | 33.10 ± 6.39        | 49.53 ± 26.08              |
| 14,15-DiHETrE       | 23.01 ± 30.00       | 45.97 ± 60.00       | 11.69 ± 4.81        | 55.87 ± 52.01              |
| 16,17-DiHDPA        | 3.08 ± 3.10         | 4.62 ± 5.07         | 2.22 ± 0.32         | 5.98 ± 4.64                |
| 11,12-DiHETrE       | 8.28 ± 11.41        | 14.82 ± 19.65       | 4.16 ± 1.12         | 15.62 ± 16.00              |
| 13,14-DiHDPA        | 1.56 ± 1.96         | 3.01 ± 3.82         | 0.73 ± 0.23         | 3.19 ± 3.51                |
| 10,11-DiHDPA        | 2.13 ± 2.95         | 3.73 ± 4.84         | 0.98 ± 0.35         | 4.20 ± 4.89                |
| 8,9-DiHETrE         | 8.07 ± 11.34        | 13.83 ± 18.02       | 4.57 ± 0.69         | 14.57 ± 15.07              |
| EKODE               | 3.54 ± 2.33         | 4.11 ± 2.80         | 5.96 ± 4.01         | 13.51 ± 9.41               |
| 5,6-DiHETE          | 3.70 ± 3.44         | 3.57 ± 2.16         | 3.32 ± 1.74         | 4.95 ± 1.36                |
| 15-deoxy PGJ2       | 19.62 ± 17.71       | 19.62 ± 14.61       | 13.87 ± 6.10        | 25.22 ± 9.94               |
| 5,6-DiHETrE         | 125.41 ± 158.74     | 194.41 ± 259.89     | 90.48 ± 73.01       | 222.70 ± 265.99            |
| 13-HODE             | 429.51 ± 257.38     | 524.15 ± 302.74     | 451.12 ± 122.99     | 872.48 ± 474.06            |
| 9-HODE              | 300.96 ± 142.03     | 357.87 ± 192.88     | 325.08 ± 143.77     | 585.73 ± 296.41            |
| 15(16)-EpODE        | 41.99 ± 10.65       | 58.27 ± 53.02       | 72.58 ± 37.97       | 160.67 ± 154.83            |
| 15-HETE             | 530.27 ± 369.30     | 561.41 ± 289.02     | 467.12 ± 128.14     | 830.23 ± 712.96            |
| 9(10)-EpODE         | 14.64 ± 7.40        | 26.67 ± 32.51       | 24.28 ± 15.63       | 58.63 ± 70.88              |
| 17(18)-EpETE        | 15.01 ± 2.57        | 18.29 ± 14.34       | 17.64 ± 12.61       | 25.73 ± 22.93              |
| 17-HDoHE            | 52.52 ± 53.47       | 56.20 ± 42.74       | 43.30 ± 9.63        | 94.58 ± 55.83              |
| 11-HETE             | 479.43 ± 233.23     | 520.98 ± 232.56     | 441.54 ± 166.07     | 743.38 ± 544.91            |
| 12(13)-EpODE        | 9.43 ± 5.16         | 15.49 ± 17.75       | 14.66 ± 9.19        | 36.27 ± 41.57              |
| 13-oxo ODE          | 5.35 ± 3.55         | 7.94 ± 8.43         | 8.44 ± 3.93         | 16.13 ± 15.88              |
| 15-oxo ETE          | 28.35 ± 11.36       | 26.28 ± 6.28        | 36.84 ± 17.58       | 49.23 ± 37.41              |
| 9-oxo ODE           | 19.83 ± 8.09        | 19.05 ± 10.21       | 38.79 ± 25.37       | 58.68 ± 42.81              |
| 14(15)-EpETE        | 8.10 ± 1.49         | 9.11 ± 8.75         | 9.00 ± 6.40         | 15.86 ± 14.14              |
| 8-HETE              | 59.14 ± 42.31       | 57.76 ± 25.66       | 53.96 ± 25.02       | 99.69 ± 82.55              |
| 12-HETE             | 3,623.41 ± 1,393.06 | 4,041.11 ± 1,373.67 | 3,516.29 ± 1,039.37 | 5,499.60 ± 2,641.56        |
| 11(12)-EpETE        | 8.72 ± 1.82         | 11.56 ± 9.33        | 11.14 ± 6.90        | 19.15 ± 15.95              |
| 9-HETE              | 33.02 ± 19.78       | 31.18 ± 3.44        | 30.21 ± 10.84       | 48.75 ± 41.37              |
| 15 (s)-HETrE        | 66.98 ± 29.94       | 63.66 ± 34.26       | 56.41 ± 16.78       | 104.82 ± 82.51             |
| 12-oxo ETE          | 92.32 ± 86.22       | 60.61 ± 36.88       | 126.61 ± 113.44     | 141.26 ± 130.63            |
| 5-HETE              | 275.06 ± 127.94     | 398.68 ± 183.15     | 319.10 ± 127.92     | 436.65 ± 133.64            |
| 19,20-EDP           | 120.36 ± 12.91      | 121.37 ± 20.55      | 141.71 ± 14.74      | 353.40 ± 109.26            |
| 12(13)-EpOME        | 357.34 ± 161.64     | 312.48 ± 278.77     | 286.16 ± 179.65     | 1,045.58 ± 1,105.50        |
| 14(15)-EpETrE       | 816.49 ± 267.57     | 631.05 ± 514.45     | 582.48 ± 363.19     | 1,731.52 ± 1,494.55        |
| 9(10)-EpOME         | 308.57 ± 190.41     | 283.10 ± 269.86     | 253.98 ± 151.28     | 815.65 ± 919.41            |
| 16,17-EDP           | 68.23 ± 20.80       | 60.10 ± 49.89       | 59.65 ± 41.92       | 97.45 ± 82.72              |
| 13,14-EDP           | 56.56 ± 26.37       | 52.94 ± 44.60       | 52.00 ± 37.51       | 78.55 ± 74.00              |
| 10,11-EDP           | 79.19 ± 39.09       | 78.13 ± 78.07       | 78.91 ± 53.33       | 186.22 ± 126.44            |
| 11(12)-EpETrE       | 651.10 ± 395.40     | 500.53 ± 408.36     | 614.46 ± 394.47     | 883.27 ± 826.33            |
| 8(9)-EpETrE         | 229.53 ± 168.09     | 182.33 ± 159.70     | 220.90 ± 142.52     | 324.66 ± 328.30            |
| 5(6)-EpETrE         | 192.27 ± 130.29     | 59.74 ± 27.56       | 382.23 ± 246.78     | 112.96 ± 83.87             |
| 9-HOTrE             | 1.23 ± 0.83         | 1.61 ± 0.57         | 1.65 ± 0.35         | 2.71 ± 1.85                |

**Table S3. Cont.**

| Lipid mediator | Ctrl, pmol/g  | 19,20 EDP, pmol/g | <i>t</i> -AUCB, pmol/g | 19,20 EDP + <i>t</i> -AUCB, pmol/g |
|----------------|---------------|-------------------|------------------------|------------------------------------|
| 13-HOTrE       | 16.38 ± 18.13 | 17.19 ± 10.93     | 14.96 ± 4.13           | 43.94 ± 37.21                      |
| 15-HEPE        | 14.98 ± 14.73 | 14.18 ± 9.87      | 11.53 ± 1.92           | 26.43 ± 21.31                      |
| 8-HEPE         | 0.61 ± 0.15   | 0.77 ± 0.64       | 0.56 ± 0.42            | 0.21 ± 0.07                        |
| 12-HEPE        | 87.35 ± 16.53 | 104.88 ± 10.20    | 92.62 ± 13.35          | 105.84 ± 28.82                     |
| 5-HEPE         | 3.63 ± 1.48   | 3.54 ± 0.65       | 3.65 ± 1.30            | 5.12 ± 1.51                        |
